# Supplementary material for: Regioselective reactions of 3,4-pyridynes enabled by the aryne distortion model
Source: Springer Nature journal article supplement (doi:10.1038/nchem.1504), 2012-11-23
Supplement: 41557_2013_BFnchem1504_MOESM49_ESM.mol [file 41557_2013_BFnchem1504_MOESM49_ESM.mol]

  ChemDraw11151213492D

 18 18  0  0  0  0  0  0  0  0999 V2000
   -2.1385   -0.4111    0.0000 C   0  0  0  0  0  0  0  0  0  0  0  0
   -2.1385   -1.2361    0.0000 C   0  0  0  0  0  0  0  0  0  0  0  0
   -1.4241   -1.6486    0.0000 N   0  0  0  0  0  0  0  0  0  0  0  0
   -0.7096   -1.2361    0.0000 C   0  0  0  0  0  0  0  0  0  0  0  0
   -0.7096   -0.4111    0.0000 C   0  0  0  0  0  0  0  0  0  0  0  0
   -1.4241    0.0014    0.0000 C   0  0  0  0  0  0  0  0  0  0  0  0
   -1.4241    0.8236    0.0000 Si  0  0  0  0  0  0  0  0  0  0  0  0
   -2.1360    1.2346    0.0000 C   0  0  0  0  0  0  0  0  0  0  0  0
   -0.7121    1.2346    0.0000 C   0  0  0  0  0  0  0  0  0  0  0  0
   -1.4241    1.6486    0.0000 C   0  0  0  0  0  0  0  0  0  0  0  0
    0.0024    0.0000    0.0000 O   0  0  0  0  0  0  0  0  0  0  0  0
    0.7144   -0.4111    0.0000 S   0  0  0  0  0  0  0  0  0  0  0  0
    1.1269    0.3034    0.0000 O   0  0  0  0  0  0  0  0  0  0  0  0
    0.3019   -1.1255    0.0000 O   0  0  0  0  0  0  0  0  0  0  0  0
    1.4265   -0.8222    0.0000 C   0  0  0  0  0  0  0  0  0  0  0  0
    1.4265   -1.6444    0.0000 F   0  0  0  0  0  0  0  0  0  0  0  0
    2.1385   -1.2333    0.0000 F   0  0  0  0  0  0  0  0  0  0  0  0
    2.1385   -0.4111    0.0000 F   0  0  0  0  0  0  0  0  0  0  0  0
  1  2  2  0      
  2  3  1  0      
  3  4  2  0      
  4  5  1  0      
  5  6  2  0      
  6  1  1  0      
  6  7  1  0      
  7  8  1  0      
  7  9  1  0      
  7 10  1  0      
  5 11  1  0      
 11 12  1  0      
 12 13  2  0      
 12 14  2  0      
 12 15  1  0      
 15 16  1  0      
 15 17  1  0      
 15 18  1  0      
M  END
